# Supplementary material
Source: HighWire-hosted journal article supplement (http://cmajopen.ca/highwire/filestream/81225/field_highwire_adjunct_files/0/2018-0108-1-at.pdf)
Supplement: 2018-0108-1-at.pdf [file 2018-0108-1-at.pdf]

## Appendix 1 (as supplied by the authors): Provincial Formulary Databases

| Province | Website                                                                                                                                                                                                                                                                                                                                   | Formulary Update |
|----------|-------------------------------------------------------------------------------------------------------------------------------------------------------------------------------------------------------------------------------------------------------------------------------------------------------------------------------------------|------------------|
| BC       | <a href="https://pharmacareformularysearch.gov.bc.ca/faces/SearchResults.xhtml">https://pharmacareformularysearch.gov.bc.ca/faces/SearchResults.xhtml</a>                                                                                                                                                                                 | 27 Feb 2018      |
| AB       | <a href="https://idbl.ab.bluecross.ca/idbl/load.do">https://idbl.ab.bluecross.ca/idbl/load.do</a>                                                                                                                                                                                                                                         | 12 Mar 2018      |
| SK       | <a href="http://formulary.drugplan.ehealthsask.ca/">http://formulary.drugplan.ehealthsask.ca/</a>                                                                                                                                                                                                                                         | 1 Mar 2018       |
| MB       | <a href="https://www.gov.mb.ca/health/mdbif/index.html">https://www.gov.mb.ca/health/mdbif/index.html</a>                                                                                                                                                                                                                                 | 25 Jan 2018      |
| ON       | <a href="https://www.formulary.health.gov.on.ca/formulary/">https://www.formulary.health.gov.on.ca/formulary/</a>                                                                                                                                                                                                                         | 28 Feb 2018      |
| PQ       | <a href="http://www.ramq.gouv.qc.ca/SiteCollectionDocuments/liste_med/liste_med_2018_03_01_en.pdf">http://www.ramq.gouv.qc.ca/SiteCollectionDocuments/liste_med/liste_med_2018_03_01_en.pdf</a>                                                                                                                                           | 1 Mar 2018       |
| NB       | <a href="http://www2.gnb.ca/content/dam/gnb/Departments/h-s/pdf/en/NBDrugPlan/NewBrunswickDrugPlansFormulary.pdf">http://www2.gnb.ca/content/dam/gnb/Departments/h-s/pdf/en/NBDrugPlan/NewBrunswickDrugPlansFormulary.pdf</a>                                                                                                             | 1 Mar 2018       |
| NS       | <a href="https://novascotia.ca/dhw/pharmacare/documents/formulary.pdf">https://novascotia.ca/dhw/pharmacare/documents/formulary.pdf</a>                                                                                                                                                                                                   | 1 Mar 2018       |
| PEI      | <a href="https://www.princeedwardisland.ca/sites/default/files/publications/pei_pharmacare_formulary.pdf">https://www.princeedwardisland.ca/sites/default/files/publications/pei_pharmacare_formulary.pdf</a>                                                                                                                             | Feb 2018         |
| NL       | <a href="http://www.health.gov.nl.ca/health/prescription/newformulary.asp">http://www.health.gov.nl.ca/health/prescription/newformulary.asp</a>                                                                                                                                                                                           | 1 Mar 2018       |
| YK       | <a href="http://www.hss.gov.yk.ca/drugformulary.php">http://www.hss.gov.yk.ca/drugformulary.php</a>                                                                                                                                                                                                                                       | 13 Mar 2018      |
| NIHB     | <a href="https://www.canada.ca/content/dam/hc-sc/documents/services/publications/health-system-services/non-insured-health-benefits-drug-benefit-list/dbl-2018-eng.pdf">https://www.canada.ca/content/dam/hc-sc/documents/services/publications/health-system-services/non-insured-health-benefits-drug-benefit-list/dbl-2018-eng.pdf</a> | 8 Mar 2018       |
| VA       | <a href="http://www.veterans.gc.ca/eng/services/health/treatment-benefits/poc/poc10/search">http://www.veterans.gc.ca/eng/services/health/treatment-benefits/poc/poc10/search</a>                                                                                                                                                         | 5 Mar 2018       |

\*Accessed 13 March 2018
